# Supplementary material for: VE-Cadherin Cleavage by LasB Protease from Pseudomonas aeruginosa Facilitates Type III Secretion System Toxicity in Endothelial Cells
Source: PubMed Central journal article supplement (PMC3953407; doi:10.1371/journal.ppat.1003939), 2014-03-13

**LasB**                      **MW**

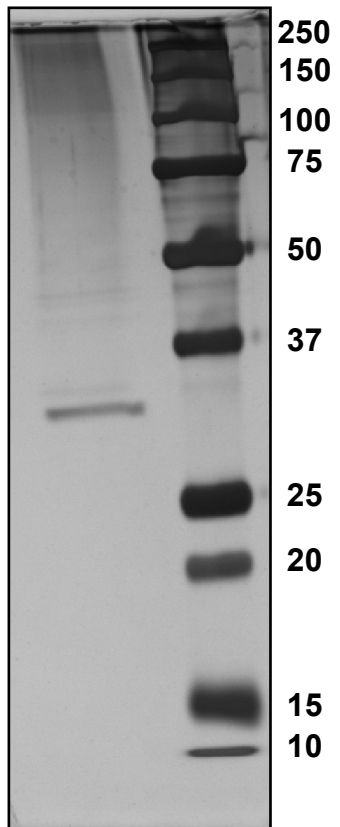

Supplement: ppat.1003939.s005.pdf [file ppat.1003939.s005.pdf]
